# Supplementary material for: Coupling and uncoupling mechanisms in the methoxythreonine mutant of cytochrome P450cam: a quantum mechanical/molecular mechanical study
Source: PubMed Central journal article supplement — J Biol Inorg Chem. 2009 Nov 20;15(3):361–72. doi: 10.1007/s00775-009-0608-3 (PMC2830628; doi:10.1007/s00775-009-0608-3), 2009-11-20
Supplement: 775_2009_608_MOESM1_ESM.pdf [file 775_2009_608_MOESM1_ESM.pdf]

Supplementary Material:

Coupling and Uncoupling Mechanisms in the  
Methoxy Threonine Mutant of Cytochrome  
P450cam: A QM/MM Study

*Muhammad Altarsha, Tobias Benighaus, Devesh Kumar, and Walter Thiel\**

Max-Planck-Institut für Kohlenforschung, Kaiser-Wilhelm-Platz 1, D-45470 Mülheim an der  
Ruhr, Germany

thiel@mpi-muelheim.mpg.de

**Content**

1. Abbreviations and conventions.
2. Computed energies (Tables S1-S7).
3. Spin densities and Mulliken charges (Tables S8-S14).
4. Selected geometrical parameters (Tables S15-S21).
5. Optimized geometries and energy profiles for hydrogen transfer from ethyl methyl ether to OH and OOH in the gas phase (Figure S1).
6. Molecular dynamics simulations (Figures S2 and S3).
7. Energy components for the stationary points in mechanisms I and II (Table S22).
8. Computed relative energies for an additional snapshot, mechanism I in the Asp251 channel (Table S23).
9. Computed relative energies in gas-phase model systems (Figure S4).

## 1. Abbreviations and conventions.

Energies are given in kcal/mol, distances in Å, angles in degree, and charges and spin densities in e. Energies (in kcal/mol) refer to the following basis sets:

B1: LACVP (Fe)/6-31G (rest) for optimization (doublet/quartet)

B2: TZVP all for single-point calculations

In Tables S15-S21 of geometrical parameters:

Glu366 channel: W1: Wat523, W2: Wat566, W3: Wat687, and W4: Wat902

Asp251 channel: W1: Wat901

### *Mechanisms:*

Glu-C-I: mechanism I in Glu366 channel (coupling reaction): O<sup>1</sup>-O<sup>2</sup> bond cleavage, then proton transfer from methoxy group to O<sup>2</sup> (distal oxygen) followed by proton transfer from Glu366 to methoxy group through a water network.

Glu-C-II: mechanism II in Glu366 channel (coupling reaction): Direct proton transfer from methoxy group to O<sup>2</sup> (distal oxygen) followed by proton transfer from Glu<sub>366</sub> to methoxy group through a water network.

Glu-C-III: mechanism III in Glu366 channel (uncoupling reaction): O<sup>1</sup>-Fe bond cleavage, then proton transfer from methoxy group to O<sup>1</sup> (proximal oxygen) followed by proton transfer from Glu366 to methoxy group through a water network.

Glu-C-IV: mechanism IV in Glu366 channel (uncoupling reaction): Direct proton transfer from methoxy group to O<sup>1</sup> (proximal oxygen) followed by proton transfer from Glu366 to methoxy group through a water network.

Asp-C-I: mechanism I in Asp251 channel (coupling reaction): O<sup>1</sup>-O<sup>2</sup> bond cleavage, then proton transfer from methoxy group to O<sup>2</sup> (distal oxygen) followed by proton transfer from Asp251 to methoxy group through one water molecule.

Asp-C-II: mechanism II in Asp251 channel (coupling Reaction): Direct proton transfer from methoxy group to O<sup>2</sup> (distal oxygen) followed by proton transfer from Asp251 to methoxy group through one water molecule.

Asp-C-III: mechanism III in Asp251 channel (uncoupling reaction): O<sup>1</sup>-Fe bond cleavage, then proton transfer from methoxy group to O<sup>1</sup> (proximal oxygen) followed by proton transfer from Asp251 to methoxy group through one water molecule.

Asp-C-IV: mechanism IV in Asp251 channel (uncoupling reaction): Direct proton transfer from methoxy group to O<sup>1</sup> (proximal oxygen) followed by transfer from Asp251 to methoxy group through one water molecule.

## 2. Computed energies.

### Glu<sub>366</sub> Channel:

*Table S1. Computed relative energies in Glu-C-I.*

|       | Basis set | Cpd0 | TS1   | IC1   | TS2   | IC2  | TS3   | Cpd1  |
|-------|-----------|------|-------|-------|-------|------|-------|-------|
| QM/MM | B1        | 0.00 | 18.11 | 10.30 | 18.48 | 1.12 | 17.22 | 8.01  |
|       | B2        | 0.00 | 20.65 | 13.02 | 21.19 | 4.54 | 20.32 | 12.15 |

*Table S2. Computed relative energies in Glu-C-II.*

|       | Basis set | Cpd0 | TS1   | IC1  | TS2   | Cpd1  |
|-------|-----------|------|-------|------|-------|-------|
| QM/MM | B1        | 0.00 | 20.78 | 0.84 | 19.96 | 8.04  |
|       | B2        | 0.00 | 23.77 | 2.33 | 24.48 | 13.53 |

*Table S3. Computed relative energies in Glu-C-III.*

|       | Basis set | Cpd0 | TS1   | IC1   | TS2   | IC2   | TS3   | Fe RS |
|-------|-----------|------|-------|-------|-------|-------|-------|-------|
| QM/MM | B1        | 0.00 | 30.25 | 17.74 | 42.35 | 40.61 | 60.74 | 28.42 |
|       | B2        | 0.00 | 32.20 | 20.02 | 43.79 | 41.68 | 63.99 | 30.00 |

*Table S4. Computed relative energies in Glu-C-IV.*

|       | Basis set | Cpd0 | TS1c  | IC1   | TS2   | Fe RS |
|-------|-----------|------|-------|-------|-------|-------|
| QM/MM | B1        | 0.00 | 40.25 | 37.99 | 58.25 | 25.19 |
|       | B2        | 0.00 | 42.04 | 36.11 | 59.64 | 27.71 |

### Asp<sub>251</sub> Channel:

*Table S5. Computed relative energies in Asp-C-I.*

|       | Basis set | Cpd0 | TS1   | IC1   | TS2   | IC2   | TS3   | Cpd1  |
|-------|-----------|------|-------|-------|-------|-------|-------|-------|
| QM/MM | B1        | 0.00 | 18.63 | 14.43 | 22.55 | 11.37 | 23.01 | 7.65  |
|       | B2        | 0.00 | 19.02 | 15.41 | 23.61 | 14.04 | 25.85 | 11.29 |

*Table S6. Computed relative energies in Asp-C-III.*

|       | Basis set | Cpd0 | TS1   | IC1   | TS2   | IC2   | TS3   | Fe RS |
|-------|-----------|------|-------|-------|-------|-------|-------|-------|
| QM/MM | B1        | 0.00 | 28.08 | 25.74 | 47.57 | 47.41 | 58.37 | 28.83 |
|       | B2        | 0.00 | 30.01 | 28.58 | 50.06 | 49.00 | 61.49 | 30.92 |

**Table S7.** Computed relative energies in Asp-C-IV.

|       | Basis set | Cpd0 | TS1   | IC1   | TS2   | Fe RS |
|-------|-----------|------|-------|-------|-------|-------|
| QM/MM | B1        | 0.00 | 52.89 | 47.55 | 54.94 | 26.44 |
|       | B2        | 0.00 | 55.07 | 50.74 | 55.83 | 29.06 |

### 3. Spin densities and Mulliken charges.

#### Glu<sub>366</sub> channel:

**Table S8.** Computed spin densities and Mulliken charge distributions for doublet states of reactant, intermediates and product in Glu-C-I.

|             |    |        | Fe    | OH <sup>a</sup> | O <sub>1</sub> | SH     | Por    | MeO-Thr <sub>252</sub> | Glu <sub>366</sub> |
|-------------|----|--------|-------|-----------------|----------------|--------|--------|------------------------|--------------------|
| <b>Cpd0</b> | B1 | Spin   | 0.998 | -0.001          | 0.091          | -0.022 | -0.066 | 0.000                  | 0.000              |
|             |    | Charge | 0.435 | -0.042          | -0.376         | -0.438 | -0.535 | 0.012                  | -0.123             |
|             | B2 | Spin   | 1.027 | -0.001          | -0.078         | -0.023 | -0.081 | 0.000                  | 0.000              |
|             |    | Charge | 0.347 | -0.011          | -0.321         | -0.560 | -0.434 | 0.001                  | -0.113             |
| <b>IC1</b>  | B1 | Spin   | 1.399 | -0.927          | 0.714          | -0.029 | -0.156 | 0.001                  | 0.000              |
|             |    | Charge | 0.465 | -0.041          | -0.519         | -0.462 | -0.361 | 0.014                  | -0.122             |
|             | B2 | Spin   | 1.486 | -0.910          | 0.660          | -0.033 | -0.202 | 0.000                  | 0.000              |
|             |    | Charge | 0.287 | -0.064          | -0.465         | -0.587 | -0.133 | -0.003                 | -0.111             |
| <b>IC2</b>  | B1 | Spin   | 1.364 | 0.009           | 0.742          | -0.027 | -0.109 | -0.981                 | 0.000              |
|             |    | Charge | 0.451 | 0.029           | -0.508         | -0.469 | -0.415 | -0.033                 | -0.122             |
|             | B2 | Spin   | 1.457 | 0.008           | 0.684          | -0.031 | -0.139 | -0.981                 | 0.000              |
|             |    | Charge | 0.291 | 0.018           | -0.461         | -0.595 | -0.224 | -0.006                 | -0.111             |
| <b>Cpd1</b> | B1 | Spin   | 1.355 | -0.003          | 0.771          | -0.130 | -0.731 | 0.000                  | -0.273             |
|             |    | Charge | 0.453 | 0.014           | -0.470         | -0.417 | 0.143  | -0.054                 | -0.594             |
|             | B2 | Spin   | 1.454 | 0.005           | 0.706          | -0.146 | -0.767 | 0.001                  | -0.251             |
|             |    | Charge | 0.276 | 0.029           | -0.431         | -0.518 | 0.398  | -0.052                 | -0.642             |

<sup>a</sup> OH species bound to FeO unit, protonated in IC2 and Cpd1.

**Table S9.** Computed spin densities and Mulliken charge distributions for doublet states of reactant, intermediates and product in Glu-C-II.

|             |    |        | Fe    | OH <sup>a</sup> | O <sub>1</sub> | SH     | Por    | MeO-Thr <sub>252</sub> | Glu <sub>366</sub> |
|-------------|----|--------|-------|-----------------|----------------|--------|--------|------------------------|--------------------|
| <b>Cpd0</b> | B1 | Spin   | 0.998 | -0.001          | 0.091          | -0.022 | -0.066 | 0.000                  | 0.000              |
|             |    | Charge | 0.435 | -0.042          | -0.376         | -0.438 | -0.535 | 0.012                  | -0.123             |
|             | B2 | Spin   | 1.027 | -0.001          | -0.078         | -0.023 | -0.081 | 0.000                  | 0.000              |
|             |    | Charge | 0.347 | -0.011          | -0.321         | -0.560 | -0.434 | 0.001                  | -0.113             |
| <b>IC1</b>  | B1 | Spin   | 1.373 | 0.009           | 0.734          | -0.026 | -0.102 | -0.990                 | 0.000              |
|             |    | Charge | 0.452 | 0.032           | -0.512         | -0.462 | -0.412 | -0.042                 | -0.122             |
|             | B2 | Spin   | 1.434 | 0.005           | 0.721          | -0.040 | -0.109 | -0.976                 | 0.000              |
|             |    | Charge | 0.291 | 0.020           | -0.459         | -0.578 | -0.252 | -0.053                 | -0.115             |
| <b>Cpd1</b> | B1 | Spin   | 1.353 | 0.006           | 0.773          | -0.128 | -0.679 | -0.001                 | -0.326             |
|             |    | Charge | 0.449 | 0.012           | -0.470         | -0.409 | 0.098  | -0.047                 | -0.550             |
|             | B2 | Spin   | 1.447 | 0.005           | 0.710          | -0.138 | -0.736 | 0.000                  | -0.303             |
|             |    | Charge | 0.280 | 0.031           | -0.430         | -0.507 | 0.298  | -0.044                 | -0.614             |

<sup>a</sup> OH species bound to FeO unit, protonated in IC1 and Cpd1.

**Table S10.** Computed spin densities and Mulliken charge distributions for doublet states of reactant, intermediates and product in Glu-C-III.

|              |    |        | <b>Fe</b> | <b>OOH<sup>a</sup></b> | <b>SH</b> | <b>Por</b> | <b>MeO-Thr<sub>252</sub></b> | <b>Glu<sub>366</sub></b> |
|--------------|----|--------|-----------|------------------------|-----------|------------|------------------------------|--------------------------|
| <b>Cpd0</b>  | B1 | Spin   | 0.998     | 0.090                  | -0.022    | -0.066     | 0.000                        | 0.000                    |
|              |    | Charge | 0.435     | -0.418                 | -0.438    | -0.535     | 0.012                        | -0.123                   |
|              | B2 | Spin   | 1.027     | -0.079                 | -0.023    | -0.081     | 0.000                        | 0.000                    |
|              |    | Charge | 0.347     | -0.332                 | -0.560    | -0.434     | 0.001                        | -0.113                   |
| <b>IC1</b>   | B1 | Spin   | 1.963     | -0.918                 | -0.047    | -0.091     | 0.000                        | 0.000                    |
|              |    | Charge | 0.388     | -0.096                 | -0.602    | -0.660     | 0.037                        | -0.120                   |
|              | B2 | Spin   | 1.978     | -0.876                 | 0.036     | -0.137     | 0.000                        | 0.000                    |
|              |    | Charge | 0.626     | -0.136                 | -0.703    | -0.787     | 0.028                        | -0.109                   |
| <b>IC2</b>   | B1 | Spin   | 2.000     | -0.066                 | 0.080     | -0.082     | -0.933                       | 0.000                    |
|              |    | Charge | 0.365     | 0.009                  | -0.662    | -0.685     | 0.007                        | -0.121                   |
|              | B2 | Spin   | 2.035     | -0.039                 | 0.093     | -0.133     | -0.957                       | 0.000                    |
|              |    | Charge | 0.596     | 0.001                  | -0.768    | -0.809     | -0.016                       | -0.111                   |
| <b>Fe RS</b> | B1 | Spin   | 1.205     | -0.007                 | -0.096    | -0.105     | 0.003                        | 0.000                    |
|              |    | Charge | 0.392     | 0.120                  | -0.209    | -0.315     | -0.064                       | -0.816                   |
|              | B2 | Spin   | 1.210     | 0.003                  | -0.106    | -0.104     | -0.003                       | 0.000                    |
|              |    | Charge | 0.413     | 0.022                  | -0.332    | -0.254     | -0.046                       | -0.826                   |

<sup>a</sup> OOH species bound to Fe atom, protonated in IC2 and Fe RS.

**Table S11.** Computed spin densities and Mulliken charge distributions for doublet states of reactant, intermediates and product in Glu-C-IV.

|              |    |        | <b>Fe</b> | <b>OOH<sup>a</sup></b> | <b>SH</b> | <b>Por</b> | <b>MeO-Thr<sub>252</sub></b> | <b>Glu<sub>366</sub></b> |
|--------------|----|--------|-----------|------------------------|-----------|------------|------------------------------|--------------------------|
| <b>Cpd0</b>  | B1 | Spin   | 0.998     | 0.090                  | -0.022    | -0.066     | 0.000                        | 0.000                    |
|              |    | Charge | 0.435     | -0.418                 | -0.438    | -0.535     | 0.012                        | -0.123                   |
|              | B2 | Spin   | 1.027     | -0.079                 | -0.023    | -0.081     | 0.000                        | 0.000                    |
|              |    | Charge | 0.347     | -0.332                 | -0.560    | -0.434     | 0.001                        | -0.113                   |
| <b>IC1</b>   | B1 | Spin   | 2.000     | -0.087                 | 0.075     | -0.086     | -0.904                       | 0.000                    |
|              |    | Charge | 0.370     | -0.102                 | -0.658    | -0.690     | 0.013                        | -0.121                   |
|              | B2 | Spin   | 2.029     | -0.057                 | 0.096     | -0.142     | -0.926                       | 0.000                    |
|              |    | Charge | 0.644     | -0.016                 | -0.764    | -0.855     | -0.007                       | -0.112                   |
| <b>Fe RS</b> | B1 | Spin   | 1.204     | 0.011                  | -0.113    | -0.093     | -0.008                       | 0.000                    |
|              |    | Charge | 0.374     | 0.130                  | -0.202    | -0.300     | 0.103                        | -0.935                   |
|              | B2 | Spin   | 1.211     | 0.010                  | -0.121    | -0.095     | -0.010                       | 0.000                    |
|              |    | Charge | 0.424     | 0.048                  | -0.319    | -0.267     | 0.122                        | -0.944                   |

<sup>a</sup> OOH species bound to Fe atom, protonated in IC1 and Fe RS.

**Asp<sub>251</sub> channel:****Table S12.** Computed spin densities and Mulliken charge distributions for doublet states of reactant, intermediates and product in Asp-C-I.

|             |    |        | Fe    | OH <sup>a</sup> | O <sub>1</sub> | SH     | Por    | MeO-Thr <sub>252</sub> | Asp <sub>251</sub> |
|-------------|----|--------|-------|-----------------|----------------|--------|--------|------------------------|--------------------|
| <b>Cpd0</b> | B1 | Spin   | 0.928 | -0.002          | 0.135          | 0.002  | -0.061 | 0.000                  | 0.000              |
|             |    | Charge | 0.427 | -0.095          | -0.315         | -0.415 | -0.236 | 0.036                  | -0.168             |
|             | B2 | Spin   | 0.973 | -0.003          | 0.122          | -0.002 | -0.076 | 0.000                  | 0.000              |
|             |    | Charge | 0.305 | -0.110          | -0.223         | -0.538 | 0.149  | 0.033                  | -0.166             |
| <b>IC1</b>  | B1 | Spin   | 1.357 | -0.795          | 0.747          | -0.037 | -0.236 | -0.003                 | 0.000              |
|             |    | Charge | 0.453 | -0.125          | -0.494         | -0.462 | 0.224  | 0.010                  | -0.167             |
|             | B2 | Spin   | 1.446 | -0.761          | 0.692          | -0.044 | -0.284 | -0.004                 | 0.000              |
|             |    | Charge | 0.280 | -0.152          | -0.448         | -0.581 | 0.526  | 0.004                  | -0.158             |
| <b>IC2</b>  | B1 | Spin   | 1.345 | -0.039          | 0.752          | -0.022 | -0.085 | -0.953                 | 0.000              |
|             |    | Charge | 0.448 | -0.017          | -0.500         | -0.484 | -0.124 | 0.049                  | -0.150             |
|             | B2 | Spin   | 1.434 | -0.026          | 0.697          | -0.026 | -0.112 | -0.971                 | 0.000              |
|             |    | Charge | 0.292 | -0.012          | -0.460         | -0.604 | 0.350  | 0.002                  | -0.132             |
| <b>Cpd1</b> | B1 | Spin   | 1.352 | 0.004           | 0.772          | -0.158 | -0.547 | 0.000                  | -0.184             |
|             |    | Charge | 0.461 | 0.012           | -0.472         | -0.372 | 0.509  | -0.049                 | -0.757             |
|             | B2 | Spin   | 1.446 | 0.003           | 0.708          | -0.181 | -0.587 | 0.000                  | -0.144             |
|             |    | Charge | 0.257 | 0.019           | -0.423         | -0.469 | 0.986  | -0.027                 | -0.828             |

<sup>a</sup> OH species bound to FeO unit, protonated in IC2 and Cpd1.**Table S13.** Computed spin densities and Mulliken charge distributions for doublet states of reactant, intermediates and product in Asp-C-III.

|              |    |        | Fe    | OOH <sup>a</sup> | SH     | Por    | MeO-Thr <sub>252</sub> | Asp <sub>251</sub> |
|--------------|----|--------|-------|------------------|--------|--------|------------------------|--------------------|
| <b>Cpd0</b>  | B1 | Spin   | 0.928 | 0.133            | 0.002  | -0.061 | 0.000                  | 0.000              |
|              |    | Charge | 0.427 | -0.410           | -0.415 | -0.236 | 0.036                  | -0.168             |
|              | B2 | Spin   | 0.973 | -0.125           | -0.002 | -0.076 | 0.000                  | 0.000              |
|              |    | Charge | 0.305 | -0.333           | -0.538 | 0.149  | 0.033                  | -0.166             |
| <b>IC1</b>   | B1 | Spin   | 1.980 | -0.969           | 0.073  | -0.084 | 0.002                  | 0.000              |
|              |    | Charge | 0.418 | -0.069           | -0.626 | -0.376 | 0.048                  | -0.162             |
|              | B2 | Spin   | 1.994 | -0.943           | 0.079  | -0.114 | 0.000                  | 0.000              |
|              |    | Charge | 0.649 | -0.135           | -0.717 | -0.200 | 0.038                  | -0.151             |
| <b>IC2</b>   | B1 | Spin   | 1.993 | -0.083           | 0.090  | -0.085 | -0.918                 | 0.000              |
|              |    | Charge | 0.401 | -0.019           | -0.651 | -0.421 | 0.059                  | -0.147             |
|              | B2 | Spin   | 2.034 | -0.061           | 0.105  | -0.132 | -0.939                 | 0.000              |
|              |    | Charge | 0.647 | -0.030           | -0.747 | -0.265 | 0.016                  | -0.128             |
| <b>Fe RS</b> | B1 | Spin   | 1.439 | 0.001            | -0.162 | -0.218 | 0.000                  | 0.000              |
|              |    | Charge | 0.344 | -0.028           | -0.215 | 0.155  | 0.015                  | -0.933             |
|              | B2 | Spin   | 1.373 | 0.002            | -0.159 | -0.163 | 0.000                  | 0.000              |
|              |    | Charge | 0.445 | -0.043           | -0.307 | 0.401  | 0.022                  | -0.962             |

<sup>a</sup> OOH species bound to Fe atom, protonated in IC2 and Fe RS.

**Table S14.** Computed spin densities and Mulliken charge distributions for doublet states of reactant, intermediates and product in Asp-C-IV.

|              |    |        | <b>Fe</b> | <b>OOH<sup>a</sup></b> | <b>SH</b> | <b>Por</b> | <b>MeO-Thr<sub>252</sub></b> | <b>Asp<sub>251</sub></b> |
|--------------|----|--------|-----------|------------------------|-----------|------------|------------------------------|--------------------------|
| <b>Cpd0</b>  | B1 | Spin   | 0.928     | 0.133                  | 0.002     | -0.061     | 0.000                        | 0.000                    |
|              |    | Charge | 0.427     | -0.410                 | -0.415    | -0.236     | 0.036                        | -0.168                   |
|              | B2 | Spin   | 0.973     | -0.125                 | -0.002    | -0.076     | 0.000                        | 0.000                    |
|              |    | Charge | 0.305     | -0.333                 | -0.538    | 0.149      | 0.033                        | -0.166                   |
| <b>IC1</b>   | B1 | Spin   | 1.969     | -0.001                 | 0.105     | -0.072     | -1.000                       | 0.000                    |
|              |    | Charge | 0.378     | -0.007                 | -0.619    | -0.403     | 0.025                        | -0.158                   |
|              | B2 | Spin   | 2.012     | -0.003                 | 0.115     | -0.122     | -0.998                       | 0.000                    |
|              |    | Charge | 0.682     | -0.049                 | -0.722    | -0.307     | 0.015                        | -0.144                   |
| <b>Fe RS</b> | B1 | Spin   | 1.442     | 0.002                  | -0.171    | -0.207     | -0.001                       | 0.000                    |
|              |    | Charge | 0.389     | 0.054                  | -0.229    | 0.136      | -0.087                       | -0.941                   |
|              | B2 | Spin   | 1.362     | 0.001                  | -0.153    | -0.156     | 0.000                        | 0.000                    |
|              |    | Charge | 0.467     | 0.031                  | -0.324    | 0.352      | -0.036                       | -0.972                   |

<sup>a</sup> OOH species bound to Fe atom, protonated in IC1 and Fe RS.

#### 4. Selected geometrical parameters.

##### Glu<sub>366</sub> Channel:

*Table S15. Geometry parameters for B1 in Glu-C-I.*

|              | S - Fe | Fe - O <sub>1</sub> | O <sub>1</sub> - O <sub>2</sub> | O <sub>2</sub> -H <sub>2</sub> | O <sub>2</sub> -<br>H <sub>res</sub> | C <sub>res</sub> -<br>H <sub>w4</sub> | O <sub>w4</sub> -<br>H <sub>w3</sub> | O <sub>w3</sub> -<br>H <sub>w2</sub> | O <sub>w2</sub> -<br>H <sub>w1</sub> | O <sub>w1</sub> -<br>H <sub>Glu366</sub> |
|--------------|--------|---------------------|---------------------------------|--------------------------------|--------------------------------------|---------------------------------------|--------------------------------------|--------------------------------------|--------------------------------------|------------------------------------------|
| <b>RC</b>    | 2.550  | 1.854               | 1.513                           | 0.987                          | 2.158                                | 2.504                                 | 1.855                                | 1.856                                | 1.634                                | 1.525                                    |
| <b>TS1</b>   | 2.514  | 1.666               | 2.414                           | 0.985                          | 2.120                                | 2.466                                 | 1.804                                | 1.875                                | 1.636                                | 1.528                                    |
| <b>IC1</b>   | 2.510  | 1.678               | 2.711                           | 1.018                          | 2.416                                | 2.483                                 | 1.814                                | 1.890                                | 1.639                                | 1.530                                    |
| <b>TS2</b>   | 2.512  | 1.673               | 2.646                           | 1.016                          | 1.318                                | 2.552                                 | 1.836                                | 1.829                                | 1.644                                | 1.522                                    |
| <b>IC2</b>   | 2.514  | 1.673               | 2.702                           | 0.997                          | 0.974                                | 2.507                                 | 1.862                                | 1.873                                | 1.636                                | 1.528                                    |
| <b>TS3</b>   | 2.507  | 1.676               | 2.654                           | 1.000                          | 0.973                                | 1.376                                 | 1.303                                | 3.012                                | 1.214                                | 1.175                                    |
| <b>Cpd 1</b> | 2.534  | 1.665               | 2.837                           | 0.986                          | 0.983                                | 1.098                                 | 1.095                                | 3.160                                | 1.025                                | 1.022                                    |

*Table S16. Geometry parameters for B1 in Glu-C-II.*

|              | S - Fe | Fe - O <sub>1</sub> | O <sub>1</sub> - O <sub>2</sub> | O <sub>2</sub> -H <sub>2</sub> | O <sub>2</sub> -<br>H <sub>res</sub> | C <sub>res</sub> -<br>H <sub>w4</sub> | O <sub>w4</sub> -<br>H <sub>w3</sub> | O <sub>w3</sub> -<br>H <sub>w2</sub> | O <sub>w2</sub> -<br>H <sub>w1</sub> | O <sub>w1</sub> -<br>H <sub>Glu366</sub> |
|--------------|--------|---------------------|---------------------------------|--------------------------------|--------------------------------------|---------------------------------------|--------------------------------------|--------------------------------------|--------------------------------------|------------------------------------------|
| <b>RC</b>    | 2.550  | 1.854               | 1.513                           | 0.987                          | 2.158                                | 2.504                                 | 1.855                                | 1.856                                | 1.634                                | 1.525                                    |
| <b>TS1</b>   | 2.499  | 1.671               | 2.333                           | 0.986                          | 1.280                                | 2.458                                 | 1.857                                | 1.799                                | 1.634                                | 1.527                                    |
| <b>IC1</b>   | 2.511  | 1.673               | 2.692                           | 0.998                          | 0.973                                | 2.531                                 | 1.831                                | 1.870                                | 1.637                                | 1.528                                    |
| <b>TS2</b>   | 2.525  | 1.667               | 2.859                           | 0.985                          | 0.984                                | 1.223                                 | 1.338                                | 1.880                                | 1.314                                | 1.246                                    |
| <b>Cpd 1</b> | 2.529  | 1.667               | 2.829                           | 0.986                          | 0.983                                | 1.087                                 | 1.015                                | 1.838                                | 1.021                                | 1.014                                    |

*Table S17. Geometry parameters for B1 in Glu-C-III.*

|              | S - Fe | Fe - O <sub>1</sub> | O <sub>1</sub> - O <sub>2</sub> | O <sub>2</sub> -H <sub>2</sub> | O <sub>1</sub> -<br>H <sub>res</sub> | C <sub>res</sub> -<br>H <sub>w4</sub> | O <sub>w4</sub> -<br>H <sub>w3</sub> | O <sub>w3</sub> -<br>H <sub>w2</sub> | O <sub>w2</sub> -<br>H <sub>w1</sub> | O <sub>w1</sub> -<br>H <sub>Glu366</sub> |
|--------------|--------|---------------------|---------------------------------|--------------------------------|--------------------------------------|---------------------------------------|--------------------------------------|--------------------------------------|--------------------------------------|------------------------------------------|
| <b>RC</b>    | 2.550  | 1.854               | 1.513                           | 3.658                          | 2.158                                | 2.504                                 | 1.855                                | 1.856                                | 1.634                                | 1.525                                    |
| <b>TS1</b>   | 2.539  | 2.896               | 1.391                           | 3.381                          | 2.108                                | 2.489                                 | 1.866                                | 1.868                                | 1.636                                | 1.527                                    |
| <b>IC1</b>   | 2.580  | 3.730               | 1.394                           | 3.770                          | 2.635                                | 2.615                                 | 1.912                                | 1.831                                | 1.647                                | 1.535                                    |
| <b>TS2</b>   | 2.633  | 4.192               | 1.493                           | 1.123                          | 2.017                                | 2.475                                 | 1.887                                | 1.843                                | 1.633                                | 1.524                                    |
| <b>IC2</b>   | 2.639  | 4.192               | 1.510                           | 1.003                          | 1.951                                | 2.464                                 | 1.866                                | 1.871                                | 1.639                                | 1.528                                    |
| <b>TS3</b>   | 2.618  | 3.726               | 1.531                           | 0.993                          | 1.971                                | 1.306                                 | 1.240                                | 2.972                                | 1.288                                | 1.374                                    |
| <b>Fe RS</b> | 2.339  | 2.205               | 1.510                           | 0.989                          | 1.971                                | 1.093                                 | 1.001                                | 2.996                                | 1.046                                | 1.064                                    |

*Table S18. Geometry parameters for B1 in Glu-C-IV.*

|              | S - Fe | Fe - O <sub>1</sub> | O <sub>1</sub> - O <sub>2</sub> | O <sub>2</sub> -H <sub>2</sub> | O <sub>1</sub> - H <sub>res</sub> | C <sub>res</sub> -<br>H <sub>w4</sub> | O <sub>w4</sub> -<br>H <sub>w3</sub> | O <sub>w3</sub> -<br>H <sub>w2</sub> | O <sub>w2</sub> -<br>H <sub>w1</sub> | O <sub>w1</sub> -<br>H <sub>Glu366</sub> |
|--------------|--------|---------------------|---------------------------------|--------------------------------|-----------------------------------|---------------------------------------|--------------------------------------|--------------------------------------|--------------------------------------|------------------------------------------|
| <b>RC</b>    | 2.550  | 1.854               | 1.513                           | 3.658                          | 2.158                             | 2.504                                 | 1.855                                | 1.856                                | 1.634                                | 1.525                                    |
| <b>TS1</b>   | 2.621  | 3.753               | 1.491                           | 1.134                          | 2.045                             | 2.560                                 | 1.860                                | 1.950                                | 1.636                                | 1.525                                    |
| <b>IC1</b>   | 2.626  | 3.680               | 1.509                           | 1.005                          | 1.963                             | 2.534                                 | 1.856                                | 1.958                                | 1.635                                | 1.525                                    |
| <b>TS2</b>   | 2.604  | 3.151               | 1.513                           | 0.999                          | 2.142                             | 1.201                                 | 1.226                                | 1.461                                | 1.360                                | 1.414                                    |
| <b>Fe RS</b> | 2.348  | 2.147               | 1.512                           | 0.989                          | 2.349                             | 1.011                                 | 1.016                                | 1.812                                | 1.006                                | 1.014                                    |



**Asp<sub>251</sub> channel:***Table S19. Geometry parameters for B1 in Asp-C-I.*

|             | S - Fe | Fe - O <sub>1</sub> | O <sub>1</sub> - O <sub>2</sub> | O <sub>2</sub> - H <sub>2</sub> | O <sub>1</sub> -<br>H <sub>res</sub> | C <sub>res</sub> -<br>H <sub>w1</sub> | H <sub>w1</sub> -<br>O <sub>w1</sub> | O <sub>w1</sub> -<br>H <sub>Asp251</sub> |
|-------------|--------|---------------------|---------------------------------|---------------------------------|--------------------------------------|---------------------------------------|--------------------------------------|------------------------------------------|
| <b>RC</b>   | 2.416  | 1.842               | 1.535                           | 0.987                           | 2.209                                | 2.439                                 | 1.009                                | 1.442                                    |
| <b>TS1</b>  | 2.487  | 1.661               | 2.217                           | 0.984                           | 2.060                                | 2.468                                 | 1.009                                | 1.478                                    |
| <b>IC1</b>  | 2.510  | 1.674               | 2.880                           | 1.004                           | 2.104                                | 2.470                                 | 1.011                                | 1.476                                    |
| <b>TS2</b>  | 2.511  | 1.674               | 2.685                           | 1.014                           | 1.206                                | 2.485                                 | 1.001                                | 1.501                                    |
| <b>IC2</b>  | 2.521  | 1.672               | 2.915                           | 0.983                           | 0.981                                | 2.481                                 | 1.014                                | 1.523                                    |
| <b>TS3</b>  | 2.511  | 1.677               | 2.796                           | 0.996                           | 0.978                                | 1.282                                 | 1.999                                | 1.420                                    |
| <b>Cpd1</b> | 2.517  | 1.666               | 2.911                           | 0.984                           | 0.975                                | 1.093                                 | 2.442                                | 0.994                                    |

*Table S20. Geometry parameters for B1 in Asp-C-III.*

|              | S - Fe | Fe - O <sub>1</sub> | O <sub>1</sub> - O <sub>2</sub> | O <sub>1</sub> - H <sub>res</sub> | O <sub>1</sub> -<br>H <sub>res</sub> | C <sub>res</sub> -<br>H <sub>w</sub> | H <sub>w1</sub> -<br>O <sub>w1</sub> | O <sub>w1</sub> -<br>H <sub>Asp251</sub> |
|--------------|--------|---------------------|---------------------------------|-----------------------------------|--------------------------------------|--------------------------------------|--------------------------------------|------------------------------------------|
| <b>RC</b>    | 2.416  | 1.842               | 1.535                           | 3.050                             | 2.209                                | 2.439                                | 1.009                                | 1.442                                    |
| <b>TS1</b>   | 2.557  | 3.065               | 1.402                           | 2.151                             | 2.842                                | 2.493                                | 1.005                                | 1.489                                    |
| <b>IC1</b>   | 2.557  | 3.666               | 1.384                           | 2.148                             | 3.456                                | 2.492                                | 1.006                                | 1.488                                    |
| <b>TS2</b>   | 2.573  | 4.090               | 1.511                           | 1.111                             | 3.605                                | 2.508                                | 0.992                                | 1.537                                    |
| <b>IC2</b>   | 2.572  | 4.080               | 1.511                           | 1.001                             | 1.952                                | 2.498                                | 0.992                                | 1.537                                    |
| <b>TS3</b>   | 2.565  | 3.494               | 1.509                           | 1.000                             | 1.974                                | 1.300                                | 1.178                                | 1.424                                    |
| <b>Fe RS</b> | 2.344  | 4.319               | 1.523                           | 1.016                             | 2.533                                | 1.095                                | 2.105                                | 1.004                                    |

*Table S21. Geometry parameters for B1 in Asp-C-IV.*

|              | S - Fe | Fe - O <sub>1</sub> | O <sub>1</sub> - O <sub>2</sub> | O <sub>1</sub> - H <sub>res</sub> | O <sub>2</sub> -<br>H <sub>res</sub> | C <sub>res</sub> -<br>H <sub>w</sub> | H <sub>w1</sub> -<br>O <sub>w1</sub> | O <sub>w1</sub> -<br>H <sub>Asp251</sub> |
|--------------|--------|---------------------|---------------------------------|-----------------------------------|--------------------------------------|--------------------------------------|--------------------------------------|------------------------------------------|
| <b>RC</b>    | 2.416  | 1.842               | 1.535                           | 3.050                             | 2.209                                | 2.439                                | 1.009                                | 1.442                                    |
| <b>TS1</b>   | 2.442  | 2.083               | 1.509                           | 1.051                             | 2.001                                | 2.410                                | 1.031                                | 1.379                                    |
| <b>IC1</b>   | 2.523  | 2.981               | 1.514                           | 1.010                             | 2.000                                | 2.406                                | 0.998                                | 1.498                                    |
| <b>TS2</b>   | 2.565  | 3.264               | 1.515                           | 1.005                             | 1.984                                | 1.357                                | 1.143                                | 1.473                                    |
| <b>Fe RS</b> | 2.349  | 3.630               | 1.510                           | 0.986                             | 1.938                                | 1.097                                | 2.196                                | 1.004                                    |

5. Optimized geometries and energy profiles for hydrogen transfer from ethyl methyl ether to OH and OOH in the gas phase.

(a)

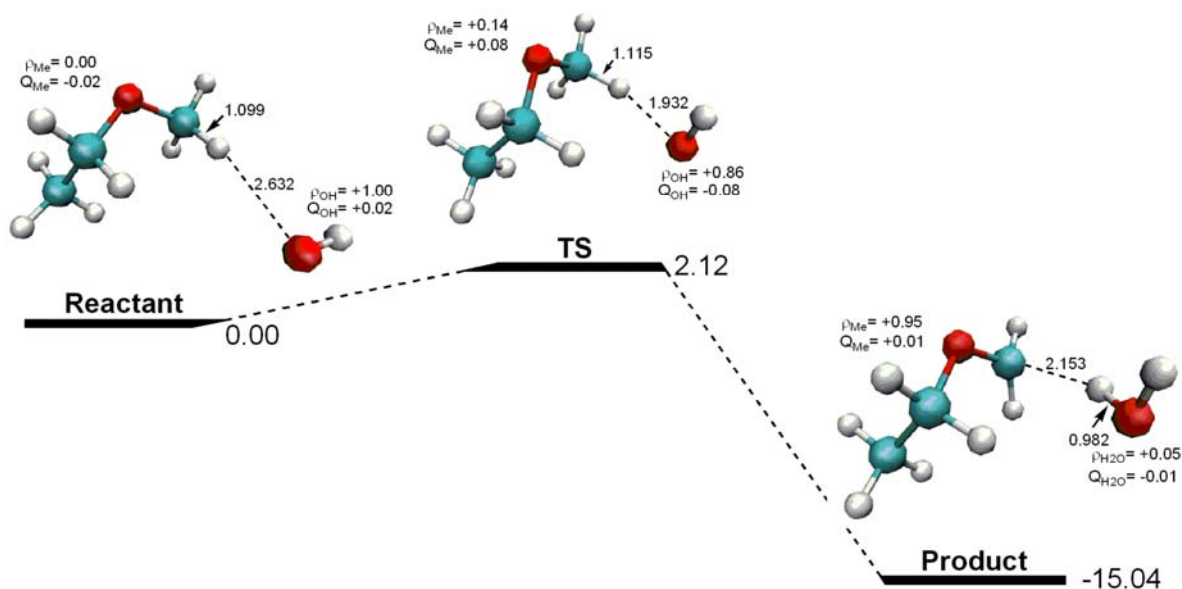

(b)

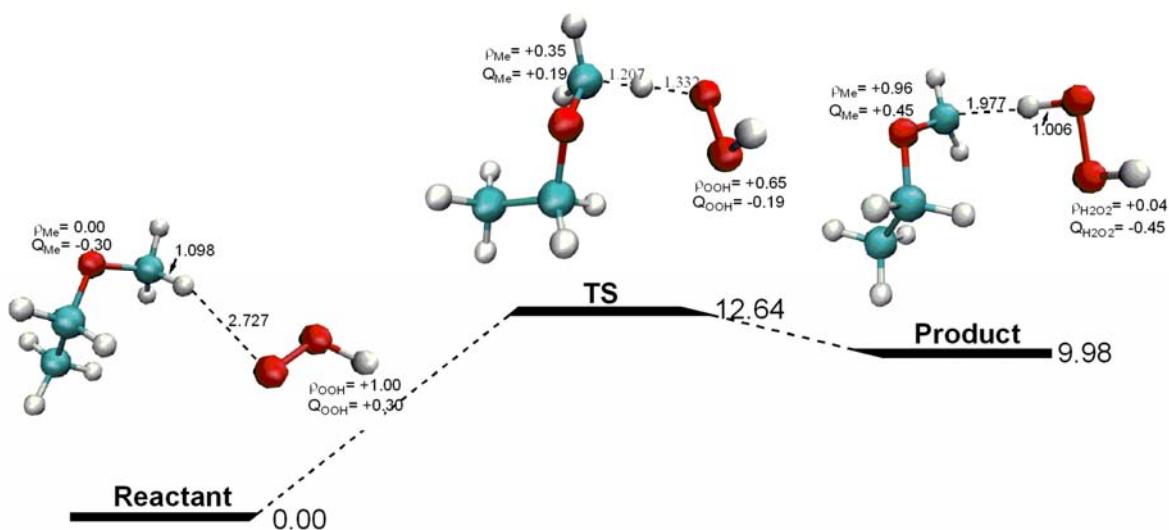

Figure S1. (a) Optimized geometries and energy profiles of reactant, TS1 and product (UB3LYP/6-31+G\*) for hydrogen transfer from methyl ethyl ether to the OH radical, (b) optimized geometries and energy profiles of reactant, TS1 and product (UB3LYP/6-31+G\*) for hydrogen transfer from methyl ethyl ether to the OOH radical. Relative energies are given in kcal/mol.

## 6. Molecular dynamics simulations.

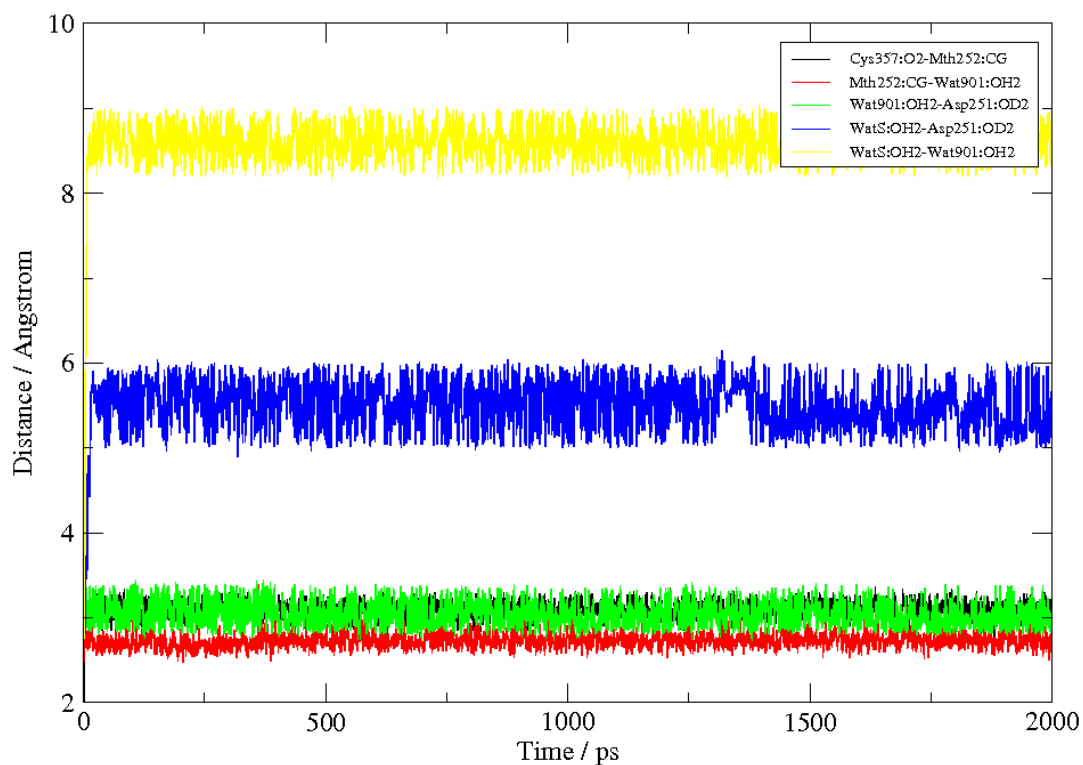

Figure S2. Monitoring the mobility of the water molecule for Thr252MeT mutant in the Asp251 channel (Thr252 has been replaced by methoxy threonine).

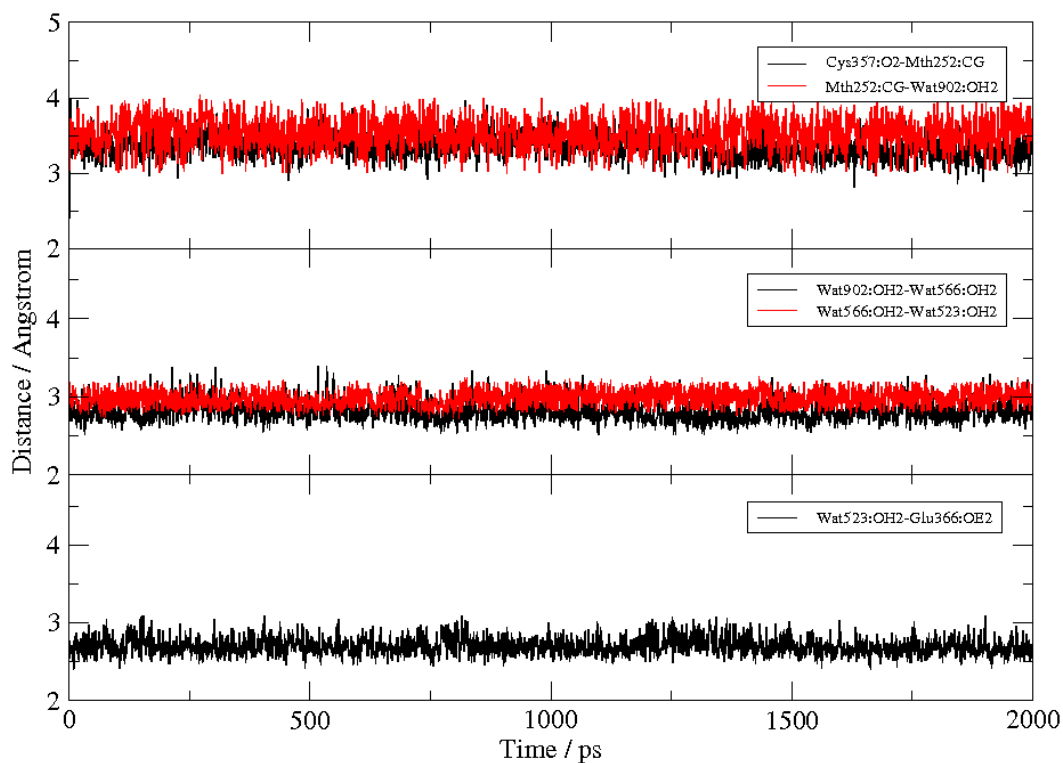

Figure S3. Monitoring the mobility of the water molecules for Thr252MeT mutant in the Glu366 channel (Thr252 has been replaced by methoxy threonine).

## 7. Energy components for the stationary points in mechanisms I and II.

Table S22: Energy components (kcal/mol) of mechanisms I and II in the Asp251 and Glu366 channels using basis set B1 (with respect to Cpd 0).

| <b>Asp-C-I</b>   | <b>RC</b> | <b>TS1</b> | <b>IC1</b> | <b>TS2</b> | <b>IC2</b> | <b>TS3</b> | <b>PC</b> |
|------------------|-----------|------------|------------|------------|------------|------------|-----------|
| <b>E(QM-ee)</b>  | 0.00      | 17.46      | 13.20      | 20.60      | 9.53       | 21.15      | 1.84      |
| <b>E(MM)</b>     | 0.00      | 1.17       | 1.23       | 1.95       | 1.84       | 1.86       | 5.81      |
| <b>E(QM/MM)</b>  | 0.00      | 18.63      | 14.43      | 22.55      | 11.37      | 23.01      | 7.65      |
| <b>E(QM-gas)</b> | 0.00      | 19.72      | 16.34      | 25.84      | 13.34      | 31.24      | 9.47      |
| <b>Glu-C-I</b>   | <b>RC</b> | <b>TS1</b> | <b>IC1</b> | <b>TS2</b> | <b>IC2</b> | <b>TS3</b> | <b>PC</b> |
| <b>E(QM-ee)</b>  | 0.00      | 17.63      | 9.47       | 17.54      | 0.72       | 15.57      | 4.06      |
| <b>E(MM)</b>     | 0.00      | 0.48       | 0.83       | 0.94       | 0.40       | 1.65       | 3.95      |
| <b>E(QM/MM)</b>  | 0.00      | 18.11      | 10.30      | 18.48      | 1.12       | 17.22      | 8.01      |
| <b>E(QM-gas)</b> | 0.00      | 20.65      | 13.02      | 20.77      | 1.18       | 20.71      | 6.21      |
| <b>Glu-C-II</b>  | <b>RC</b> | <b>TS1</b> | <b>IC1</b> | <b>TS2</b> | <b>IC2</b> | <b>TS3</b> | <b>PC</b> |
| <b>E(QM-ee)</b>  | 0.00      | 20.26      | -0.07      | 17.83      |            |            | 4.31      |
| <b>E(MM)</b>     | 0.00      | 0.52       | 0.91       | 2.13       |            |            | 3.73      |
| <b>E(QM/MM)</b>  | 0.00      | 20.78      | 0.84       | 19.96      |            |            | 8.04      |
| <b>E(QM-gas)</b> | 0.00      | 26.08      | 1.02       | 23.48      |            |            | 9.16      |

E(QM/MM) refers to the total QM/MM energy of the system. E(QM-ee) denotes the contributions from the QM calculation (including the electrostatic interactions with the MM point charges). E(MM) represents the contributions from the MM calculation and from the remaining QM/MM interactions (bonded and van-der-Waals interactions). E(QM-gas) refers to gas-phase single-point calculations at QM/MM optimized geometries.

## 8. Computed relative energies for an additional snapshot, mechanism I in the Asp251 channel

Table S23. Computed relative energies (kcal/mol) in Asp-C-I, snapshot 1500 ps.

|              | <b>Basis set</b> | <b>Cpd0</b> | <b>TS1</b> | <b>IC1</b> | <b>TS2</b> | <b>IC2</b> | <b>TS3</b> | <b>Cpd1</b> |
|--------------|------------------|-------------|------------|------------|------------|------------|------------|-------------|
| <b>QM/MM</b> | B1               | 0.00        | 19.25      | 13.02      | 21.53      | 10.45      | 23.19      | 6.92        |

The additional snapshot was drawn after 1500 ps of MD simulation. The QM/MM calculations were performed in complete analogy to those for the first snapshot (see main paper). The geometries of all stationary points were fully optimized. The results given above were obtained using basis B1.

## 9. Computed relative energies in gas-phase model systems.

Two model systems were used to study the intrinsic hydrogen and proton donor abilities of the Thr and MeT residues at the B3LYP/B1 level. For the wild-type enzyme, the model system encompassed  $C_2H_5OH$  (representing Thr252), the OH radical, the FeO porphine system, and SH (representing Cys357). The model system for the Thr252MeT mutant was designed accordingly with  $C_2H_5OCH_3$  representing the MeT residue. Both model systems are smaller than the QM regions used in the QM/MM studies (lacking Asp251 and Wat901, see Figure 1 of the main paper) to capture the intrinsic reactivities. In the wild-type model system, proton transfer to the OH radical with concomitant electron transfer from the heme is a barrier-free process making it impossible to compute the corresponding reactant and transition state structures. In the Thr252MeT model system, the hydrogen transfer proceeds over a significant barrier of 4.52 kcal/mol. Compared with the wild-type enzyme, the increase in the barrier due to Thr252MeT mutation must therefore be greater than 4.5 kcal/mol. The molecular structures of reactant, transition state, and product in the model system (shown in Figure S4) are very similar to those in the Thr252MeT enzyme.

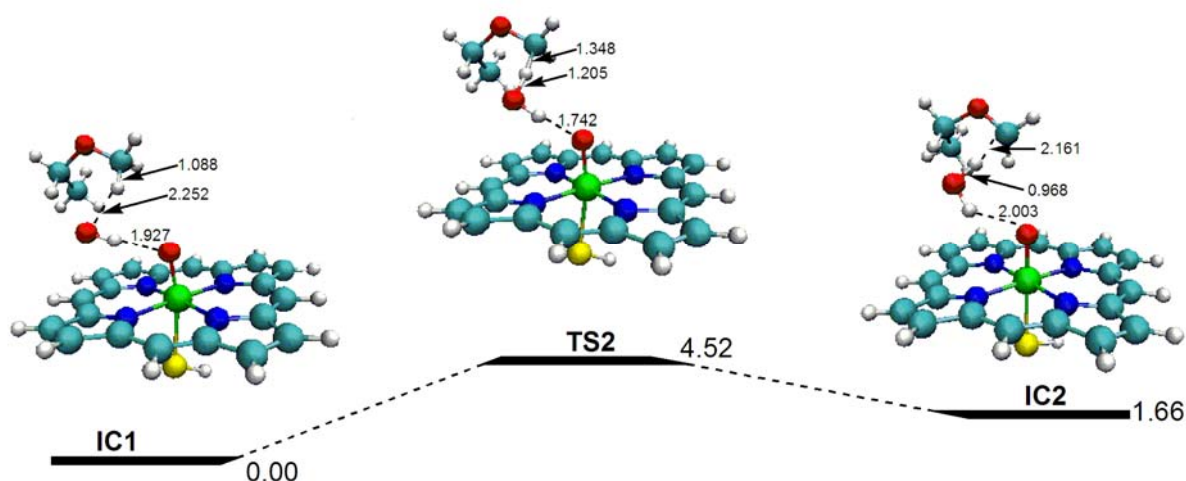

Figure S4. Optimized geometries (Å) and energy profile (kcal/mol) for hydrogen abstraction in the small QM model system of the Thr252MeT mutant computed at the UB3LYP/B1 level. Relative energies are given with respect to IC1.
